# Supplementary material for: The encapsulation of MnFe2O4 nanoparticles into the carbon framework with superior rate capability for lithium-ion batteries
Source: Royal Society of Chemistry journal article supplement (doi:10.1039/c9nr10002d), 2020-01-01
Supplement: c9nr10002d1.pdf [file c9nr10002d1.pdf]

## Encapsulation of $\text{MnFe}_2\text{O}_4$ Nanoparticles into Carbon Framework with Superior Rate Capability for Lithium Ion Battery

*Wei qin Li,<sup>a</sup> Cuihua An,<sup>b</sup> Huinan Guo,<sup>a</sup> Yan Zhang,<sup>a</sup> Kai Chen,<sup>a</sup> Zeting Zhang,<sup>a</sup>  
Guishu Liu,<sup>a</sup> Yafei Liu,<sup>a</sup> and Yijing Wang<sup>\*a</sup>*

*<sup>a</sup>Key Laboratory of Advanced Energy Materials Chemistry (Ministry of Education),  
Renewable Energy Conversion and Storage Center, College of Chemistry, Nankai  
University, Tianjin, 300071 P. R. China*

*<sup>b</sup>Tianjin Key Laboratory of Advanced Functional Porous Materials, School of  
Materials Science and Engineering, Tianjin University of Technology, Tianjin,  
300384 P. R. China*

*\*Corresponding author: Prof. Yijing Wang, E-mail: wangyj@nankai.edu.cn*

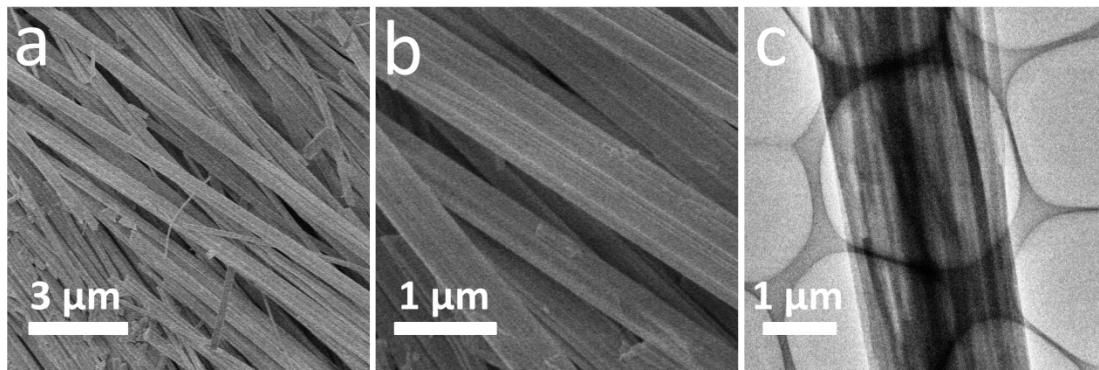

Figure S1. (a, b) SEM images and (c) TEM image of MnFe-NTA precursor.

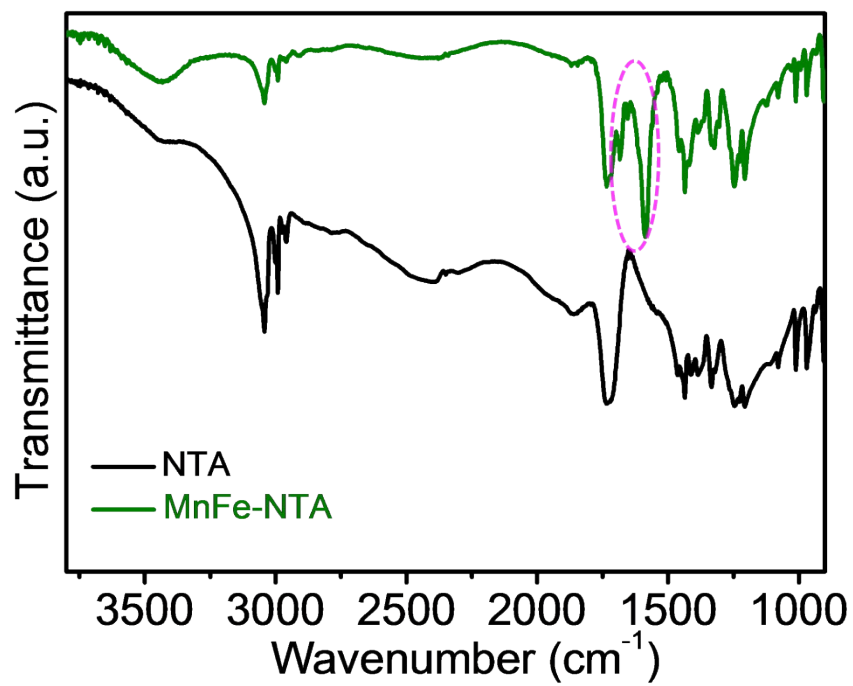

Figure S2. FT-IR spectra of NTA and MnFe-NTA precursor.

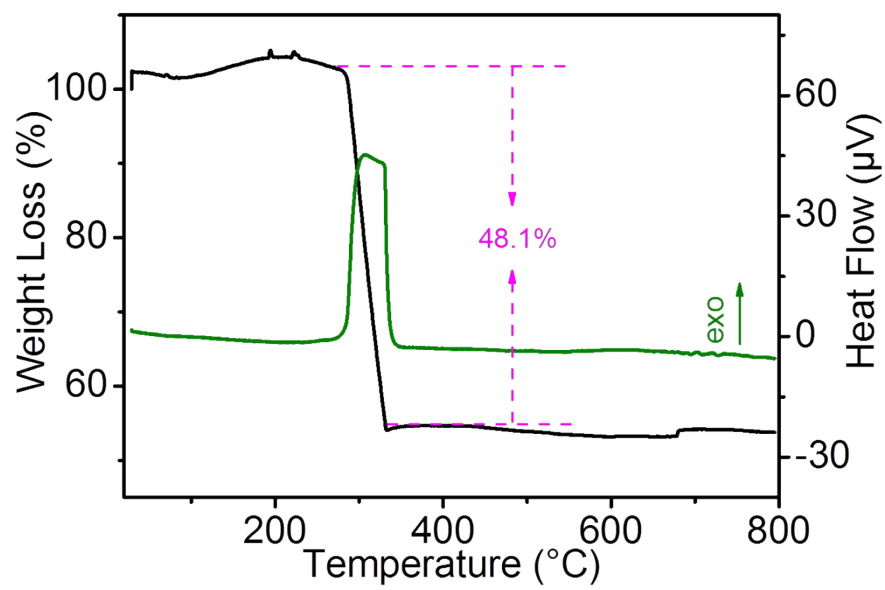

Figure S3. TG-DTA curves of MnFe-NTA precursor.

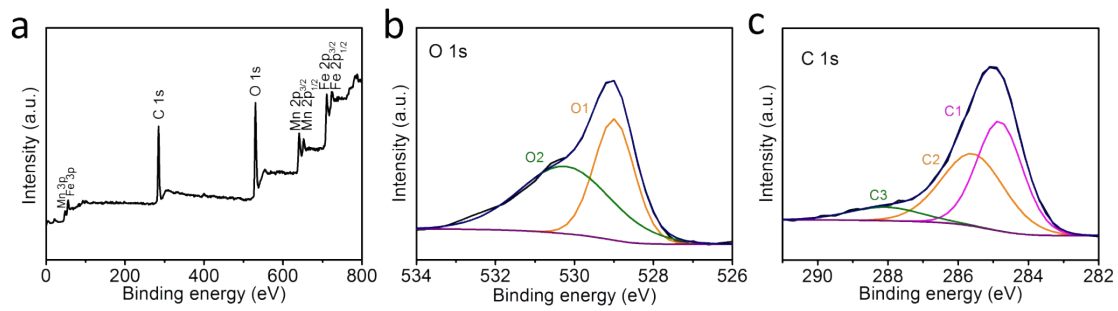

Figure S4. (a) XPS survey spectrum, the high resolution spectra of O 1s (b) and C 1s (c) for MnFe<sub>2</sub>O<sub>4</sub>@C.

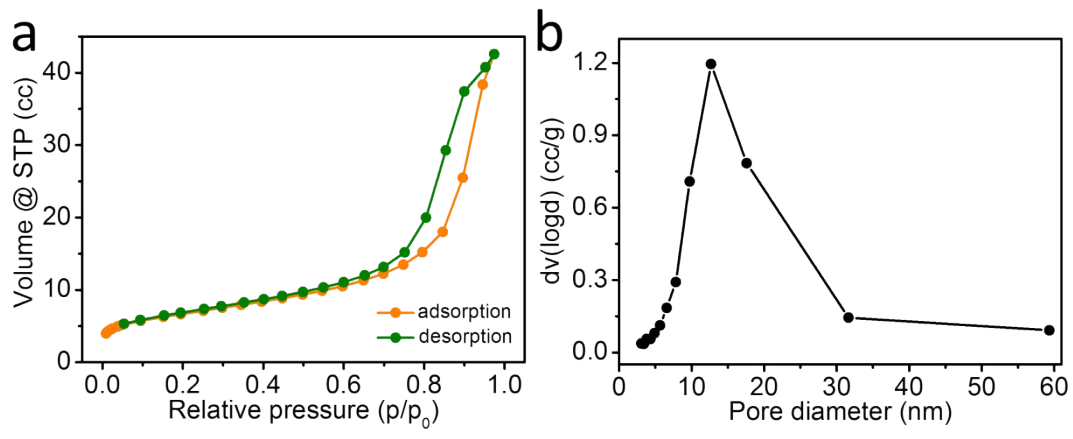

Figure S5. (a) N<sub>2</sub> adsorption-desorption isotherm and (b) pore diameter distribution curve of MnFe<sub>2</sub>O<sub>4</sub>@C.

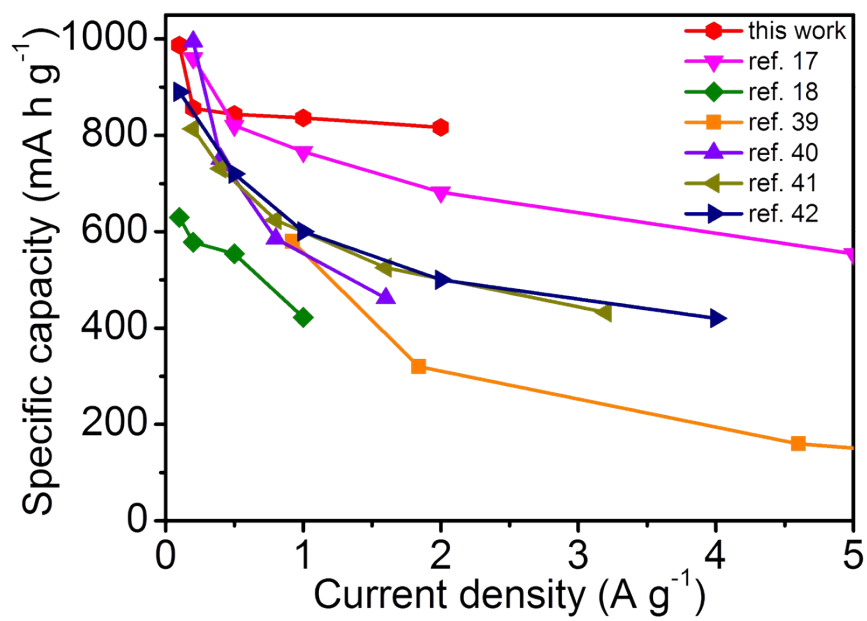

Figure S6. Comparison of rate capabilities between MnFe<sub>2</sub>O<sub>4</sub>@C and reported previously MnFe<sub>2</sub>O<sub>4</sub> electrode for LIBs.

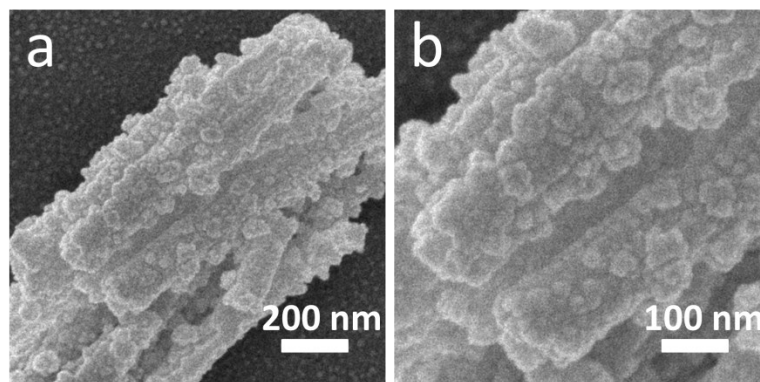

Figure S7. (a, b) SEM images of  $\text{MnFe}_2\text{O}_4@\text{C}$  electrode after 100 cycles at the current density of  $1000 \text{ mA g}^{-1}$ .



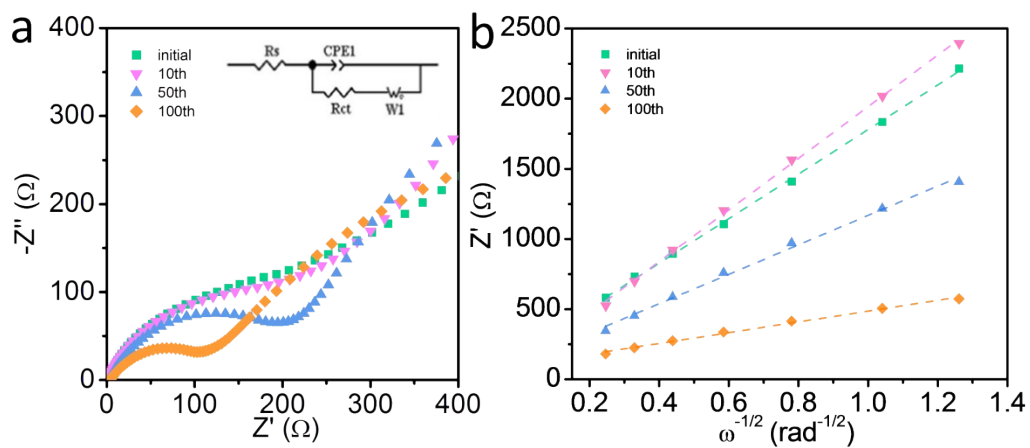

Figure S8. (a) EIS spectra with different cycles at the current density of  $1000 \text{ mA g}^{-1}$  and (b) the plots of impedance as a function of the inverse square root of angular frequency in the Warburg region for  $\text{MnFe}_2\text{O}_4@\text{C}$ .
